# Supplementary material
Source: PubMed Central journal article supplement (PMC4536255)

## FIGURE LEGENDS

**Figure 1.** CONSORT diagram.

**Figure 2.** Mean lisinopril concentration versus time after multiple dosing following once-daily dosing in patients who have received a kidney transplant. Patients were stratified by dose group: low dose = 0.1 mg/kg; middle dose = 0.2 mg/kg; and high dose = 0.4 mg/kg. One patient received twice-daily dosing and was not included.

**Figure 3.** Impact of eGFR on (A) oral clearance allometrically scaled to a 70 kg adult and (B)  $AUC_{0-24}$  dose adjusted to 0.1 mg/kg/day. The geometric mean  $AUC_{0-24}$  dose adjusted to 0.1 mg/kg in historical hypertensive children is shown for comparison.

## SUPPLEMENTAL FIGURE LEGENDS

**Supplementary Figure S1.** Linear relationship between (A)  $AUC_{0-24}$ , (B)  $C_{max}$ , or (C)  $C_{24}$  and dose in mg/kg (n=21). One patient on twice-daily dosing not included for  $C_{max}$  and  $C_{24}$  plots.

**Supplementary Figure S2.** Change in blood pressure from baseline on PK visit at T=0h (pre-dose/trough) vs. lisinopril  $AUC_{0-24}$  and pre-dose concentration in lisinopril-naïve patients (n=12).

**Supplementary Figure S3.** Bland-Altman plot comparing iohexol GFR (iGFR) and eGFR calculated using the Schwartz bedside formula.

**Supplementary Table S1. PK population patient characteristics and dosing by inclusion criteria group**

|                                                | <b>Lisinopril-naïve<br/>(n=12)</b> | <b>Standard of care<br/>(n=10)</b> | <b>All<br/>(n=22)</b> |
|------------------------------------------------|------------------------------------|------------------------------------|-----------------------|
| Dose (mg/kg/day)                               | 0.18<br>(0.09, 0.48)               | 0.12<br>(0.03, 0.21)               | 0.14<br>(0.03, 0.48)  |
| Age (y)                                        | 13.7 ± 2.9                         | 13.8 ± 3.2                         | 13.8 ± 3.0            |
| Weight (kg)                                    | 51.4 ± 23                          | 51.2 ± 26                          | 51.3 ± 23.8           |
| Female                                         | 6 (50%)                            | 2 (20%)                            | 8 (36%)               |
| Race/ethnicity                                 |                                    |                                    |                       |
| Hispanic/Latino                                | 1 (8%)                             | 3 (30%)                            | 4 (18%)               |
| Black                                          | 7 (58%)                            | 0                                  | 7 (32%)               |
| White                                          | 4 (33%)                            | 7 (70%)                            | 11 (50%)              |
| Baseline creatinine (mg/ml)                    | 1 ± 0.5                            | 1.1 ± 0.5                          | 1 ± 0.5               |
| Baseline eGFR (ml/min per 1.73m <sup>2</sup> ) | 73.6 ± 24.1                        | 66.2 ± 25.5                        | 70.2 ± 24.4           |
| Time since transplant (years)                  | 3.1 ± 3                            | 6.1 ± 4.7                          | 4.5 ± 4.1             |
| Tacrolimus use                                 | 8 (67%)                            | 8 (80%)                            | 16 (73%)              |

Data are mean ± SD (range) or counts (%); PK, pharmacokinetic; eGFR, estimated glomerular filtration rate.

**Supplementary Table S2. Summary of clinical laboratory assessments of change from baseline in lisinopril-naïve patients**

| Laboratory assessment                     | Lisinopril dose           |                              |                            | All<br>(n=15) |
|-------------------------------------------|---------------------------|------------------------------|----------------------------|---------------|
|                                           | Low<br>0.1 mg/kg<br>(n=6) | Middle<br>0.2 mg/kg<br>(n=6) | High<br>0.4 mg/kg<br>(n=3) |               |
| Potassium:<br>change score (mEq/L)        | 0.1 ± 0.3                 | -0.3 ± 0.6                   | 0.3 ± 0.5                  | 0 ± 0.5       |
| eGFR: ratio                               | 1 (14%)                   | 1.02 (10%)                   | 0.89 (14%)                 | 0.99 (13%)    |
| eGFR: largest % decrease                  | 15%                       | 12%                          | 21%                        | 21%           |
| Urine protein/creatinine:<br>change score | -0.45 ± 0.6               | -0.08 ± 0.15                 | -0.74 ± 1.37               | -0.33 ± 0.59  |

Mean change scores (worst post-dose – baseline) presented for potassium and the urine protein/creatinine ratio. Geometric mean of the ratio (worst post-dose / baseline with CV%) and greatest decrease presented for eGFR by dose group. Two patients in the high dose group had an evaluable urine protein/creatinine change score.

**Supplementary  
Figure S1.**

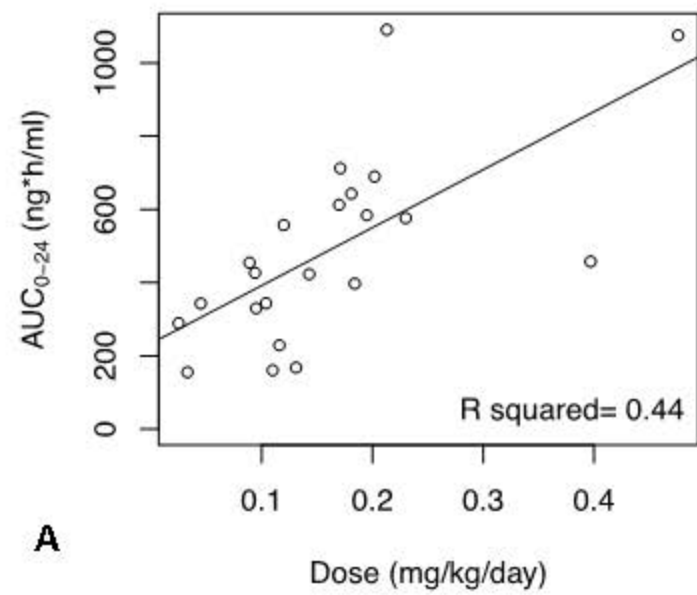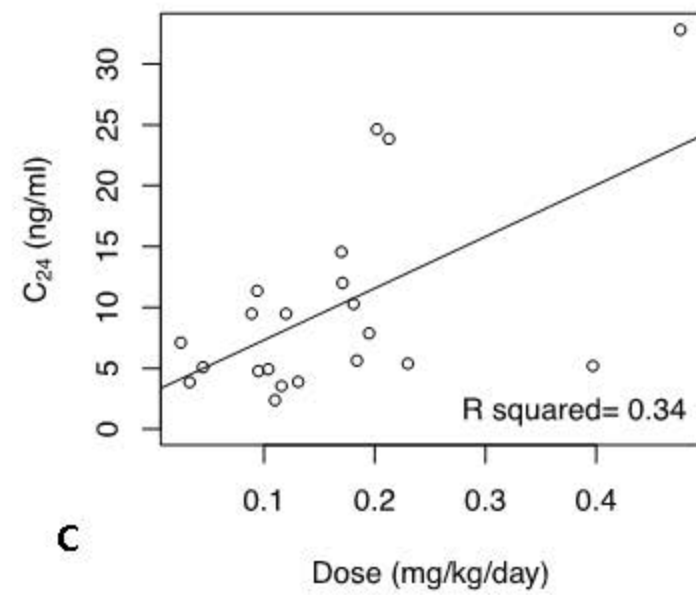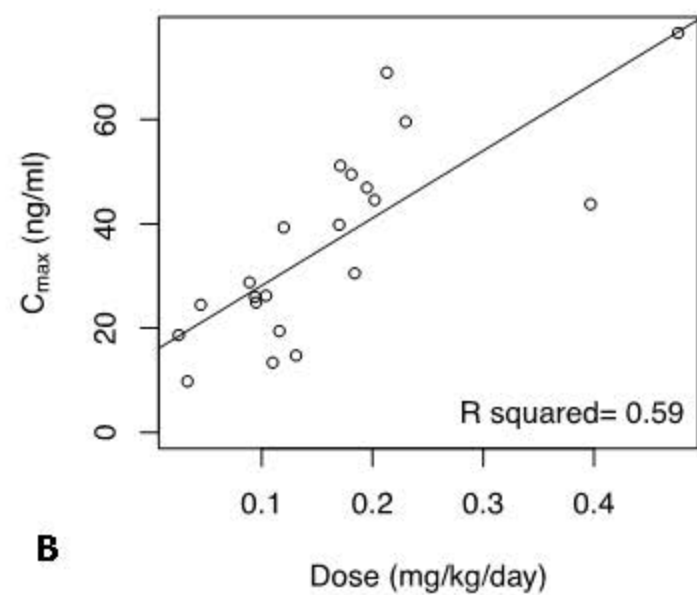

**Supplementary  
Figure S2.**

**A. Change in SBP at T=0h  
(pre-dose) vs  $AUC_{0-24}$**

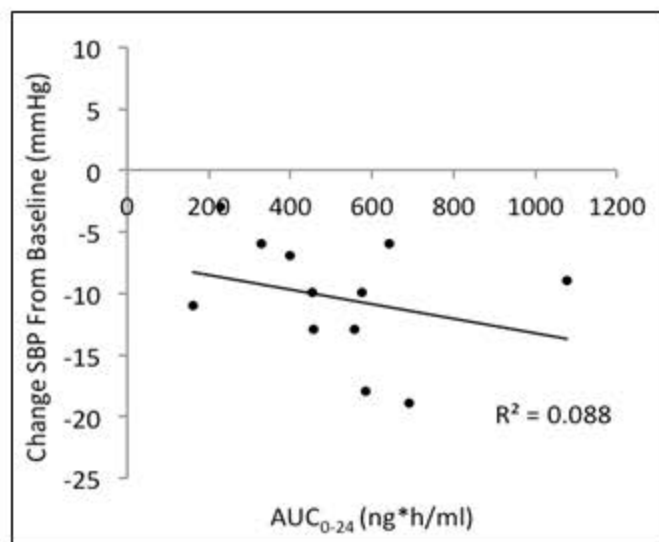

**B. Change in DBP at T=0h  
(pre-dose) vs  $AUC_{0-24}$**

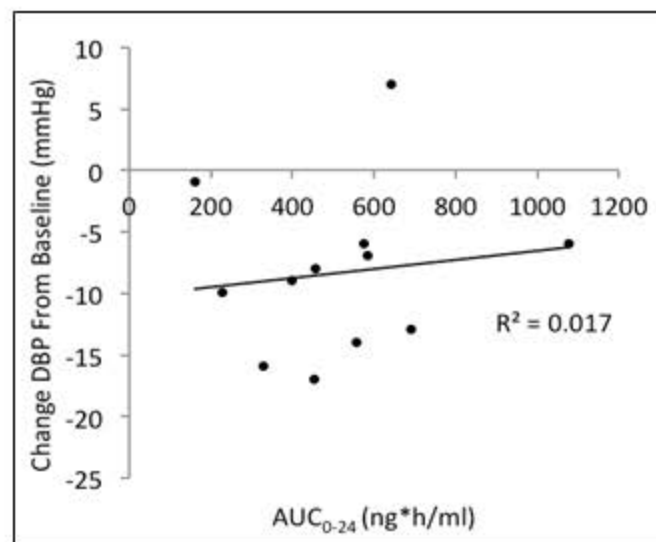

**C. Change in SBP at T=0h (pre-  
dose) vs pre-dose Concentration**

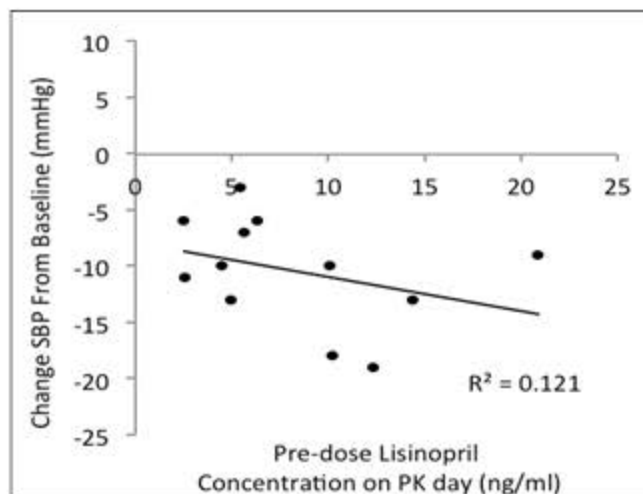

**D. Change in DBP at T=0h (pre-  
dose) vs pre-dose Concentration**

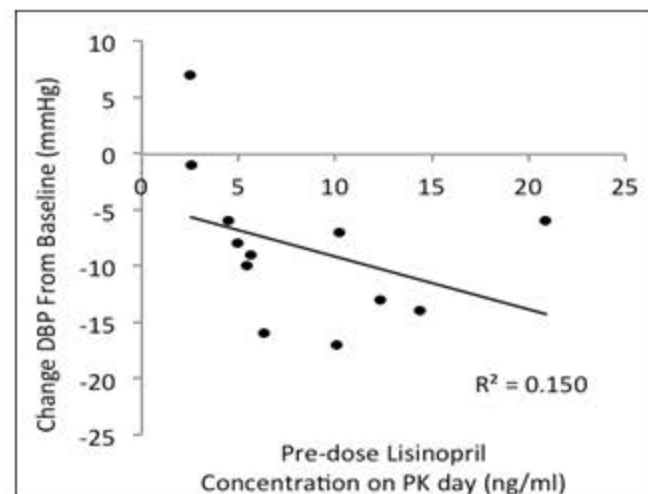

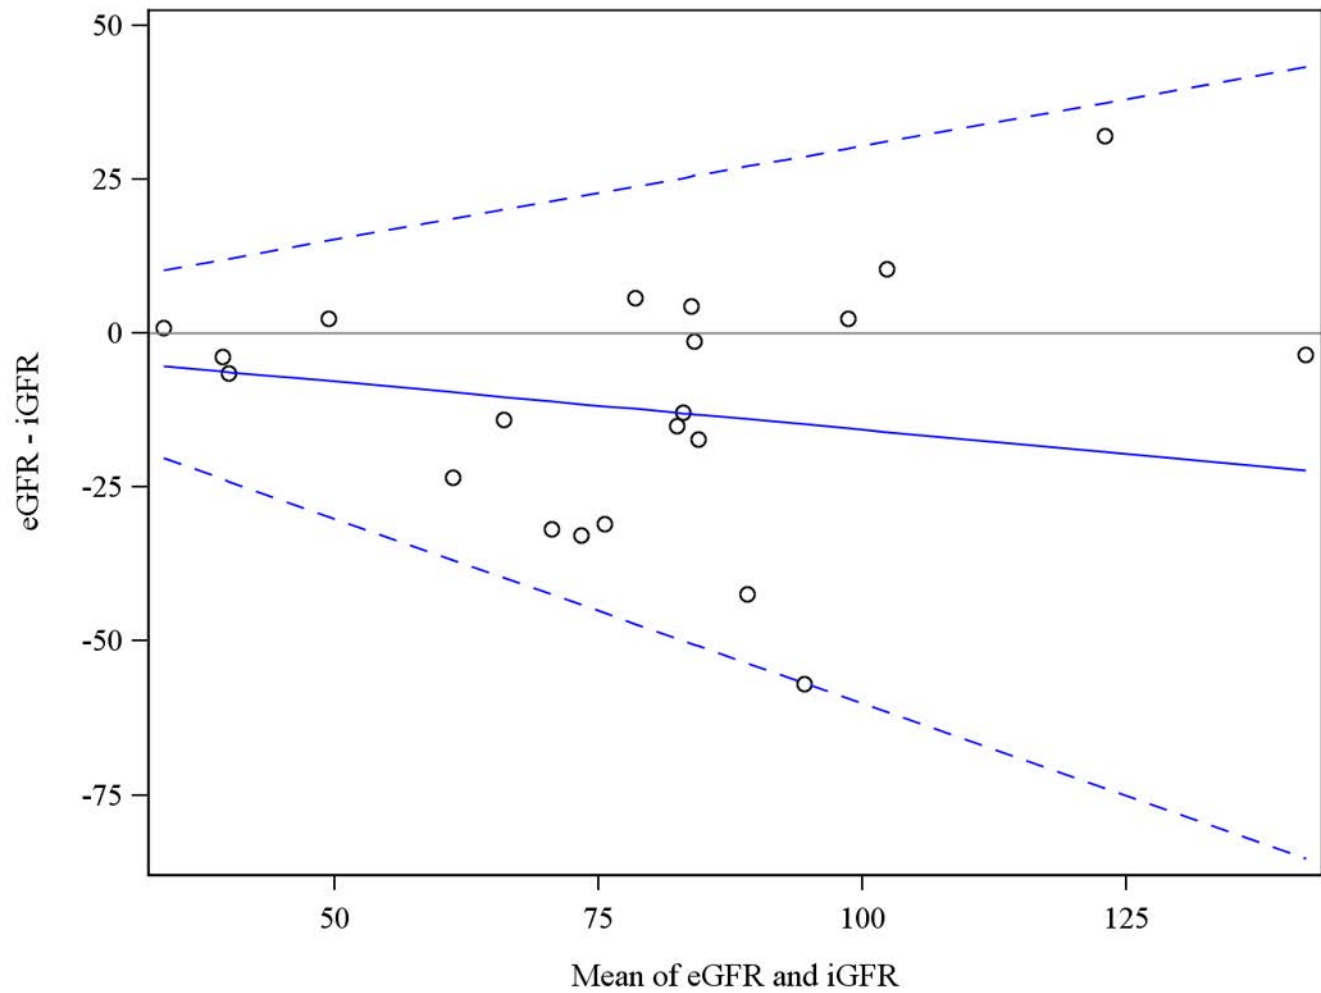

Supplement: NIHMS687489-supplement-supplement_1.pdf [file NIHMS687489-supplement-supplement_1.pdf]
